# Supplementary material for: Assessing Strain Rate Sensitivity of Nanotwinned Al–Zr Alloys through Nanoindentation
Source: MDPI journal article supplement (doi:10.3390/cryst13020276), 2023-02-05
Supplement: s1 [file s1]

# **Assessing strain rate sensitivity of nanotwinned Al-Zr alloys through nanoindentation**

N.A. Richter<sup>a</sup>, X. Sheng<sup>a</sup>, B. Yang<sup>a</sup>, H. Wang<sup>a, b</sup>, and X. Zhang<sup>a\*</sup>

<sup>a</sup> School of Materials Engineering, Purdue University, West Lafayette, IN 47907, USA

<sup>b</sup> School of Electrical and Computer Engineering, Purdue University, West Lafayette, IN 47907, USA

\*Corresponding author: X. Zhang, xzhang98@purdue.edu

## **Highlights**

- Nanotwinned Al-Zr alloys reach 4.2 GPa nanoindentation hardness through column size restriction and high 9R phase content
- Nanotwinned Al-10Zr alloy reaches strain rate sensitivity of  $m \sim 0.0297$ , enhanced from the pure Al film ( $m \sim 0.009$ )
- Nanotwins proven to enhance strain rate sensitivity through the introduction of an abundance of mobile partial dislocations

## **Keywords**

- Nanotwinned metals
- Strain rate sensitivity
- Nanoindentation
- Transmission Electron Microscopy
- Aluminum alloys

## Assessing strain rate sensitivity of nanotwinned Al-Zr alloys through nanoindentation

### Supplementary Information

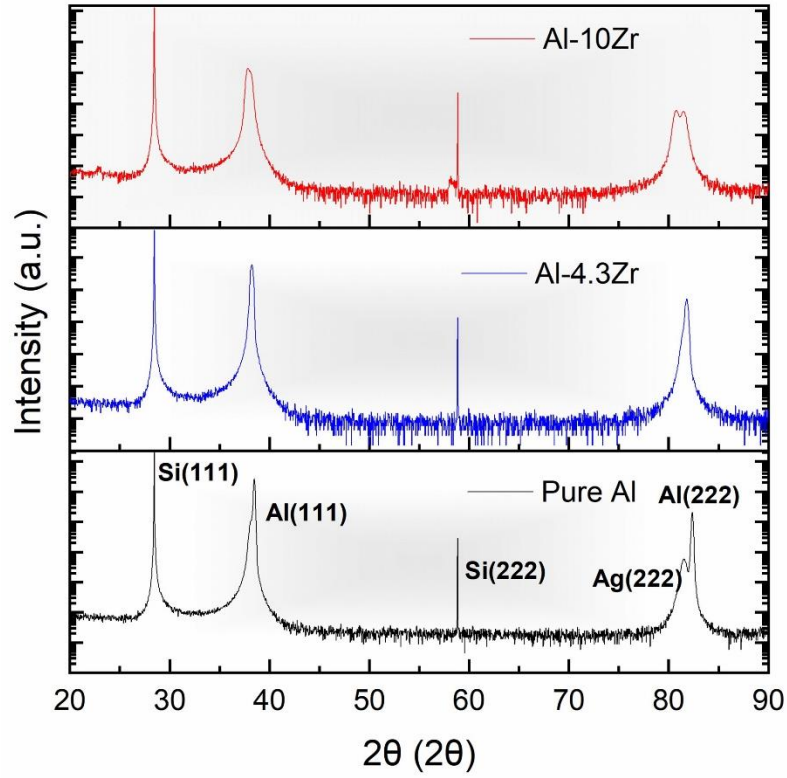

**Supplementary Figure S1.** XRD spectra revealing strong (111) texture in as-deposited films (Pure Al, Al-4.3Zr and Al-10Zr).

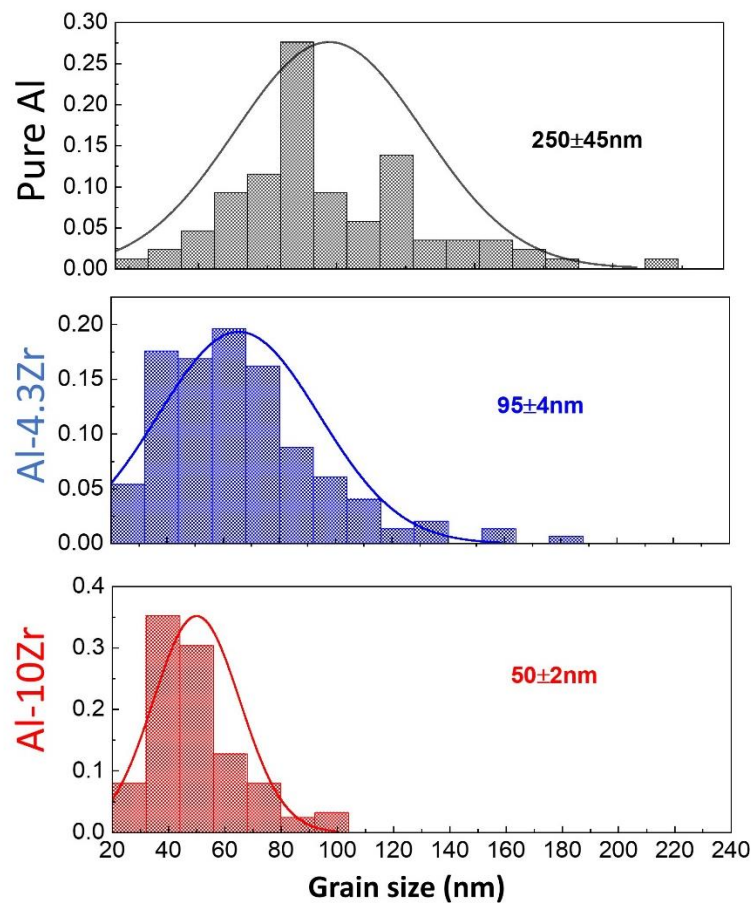

**Supplementary Figure S2.** Histograms showing grain size distribution for Pure Al, Al-4.3Zr and Al-10Zr.

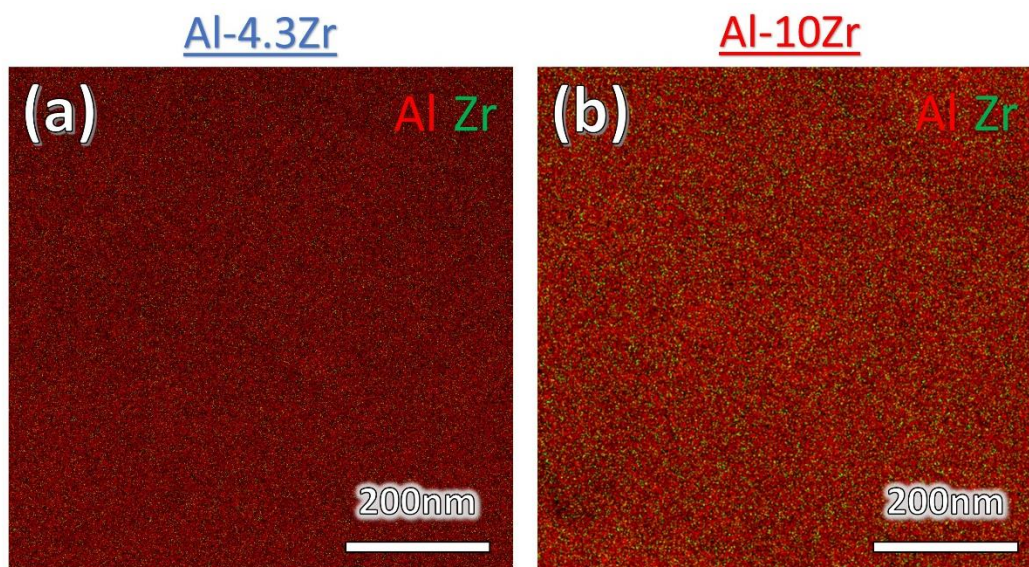

**Supplementary Figure S3.** EDS maps of (a) Al-4.3Zr and (b) Al-10Zr demonstrating obvious solid solution and no segregation or phase separation.

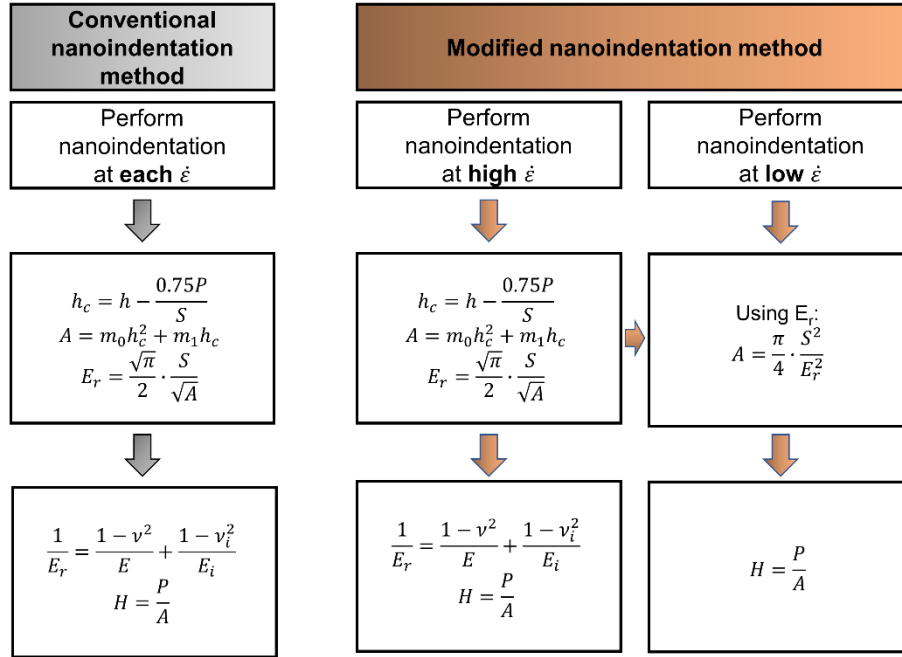

**Supplementary Figure S4.** Flow chart detailing the differences between conventional and the modified nanoindentation method for measuring hardness at low strain rates.
